# Supplementary material for: Linking departmental climate to the sense of belonging of chemistry graduate students and postdocs: evaluation and insights from the DCaDEI survey
Source: Royal Society of Chemistry journal article supplement (doi:10.1039/d4rp00322e), 2025-01-01
Supplement: d4rp00322e1.pdf [file d4rp00322e1.pdf]

## Linking Departmental Climate to the Sense of Belonging of Chemistry Graduate Students and Postdocs: Evaluation and Insights from the DCaDEI Survey

Lu Shi<sup>1</sup>, Christiane N. Stachl<sup>2</sup>, and Maia Popova<sup>1\*</sup>

<sup>1</sup>Department of Chemistry and Biochemistry, University of North Carolina at Greensboro, Greensboro, NC, 27412,  
\*m\_popova@uncg.edu

<sup>2</sup>Reflecting Equity, <https://www.reflectingequity.com/>, Oakland, CA, 94618

### Supplementary Information

#### SI 1. Departmental Climate around Diversity, Equity, and inclusion survey

*Response option: strongly agree, agree, neither agree nor disagree, disagree, strongly disagree, prefer not to answer.*

DCaDEI 1: I feel that my research advisor(s): Is/are easy to talk to about my research.

DCaDEI 2: I feel that my research advisor(s): Is/are available when I need advice concerning my research.

DCaDEI 3: I feel that my research advisor(s): Provide(s) constructive feedback on my research project.

DCaDEI 4: I feel that my research advisor(s): Treat(s) my ideas with respect.

DCaDEI 5: I feel that my research advisor(s): Encourage(s) me to attend and present at conferences.

DCaDEI 6: I feel that my research advisor(s): Advocate(s) for me when appropriate.

DCaDEI 7: I feel that my research advisor(s): Foster(s) a collaborative environment with minimal competition between group members.

DCaDEI 8: I feel that my research advisor(s): Provide(s) emotional support when necessary.

DCaDEI 9: I feel that my research advisor(s): Provide(s) non-research advice when necessary.

DCaDEI 10: I feel comfortable: Speaking with my advisor(s) about non-academic career paths.

DCaDEI 11: I feel comfortable: Disclosing mental and/or physical health conditions that may impact my work to my advisor(s)

DCaDEI 12: In my opinion, in the Department of Chemistry, I believe that: exclusionary or offensive behavior is not tolerated.

DCaDEI 13: In my opinion, in the Department of Chemistry, I believe that: harassment of any kind is not tolerated.

DCaDEI 14: In my opinion, in the Department of Chemistry, I believe that: there is sufficient discussion of equity and inclusion.

DCaDEI 15: In my opinion, in the Department of Chemistry, I believe that: there is sufficient action toward improving equity and inclusion.

DCaDEI 16: In my opinion, as a member of the Department of Chemistry, I feel that: members of the department that identify as minorities feel valued and are included.

DCaDEI 17: I feel comfortable: Seeking feedback and/or advice on my work from other faculty.

DCaDEI 18: I feel comfortable: Attending and participating in social events hosted by the Chemistry Graduate Life Committee (CGLC).

DCaDEI 19: In my opinion, as a member of the Department of Chemistry, I feel that: There are faculty members other than my research advisor(s) who are available to me when I need advice.

DCaDEI 20: In my opinion, as a member of the Department of Chemistry, I feel that: I know whom to talk with about any concerns regarding the departmental climate.

DCaDEI 21: In my opinion, as a member of the Department of Chemistry, I feel that: I am valued and included as a member of the department.

## SI 2. Sense of Belonging (SoB) Survey

Response options: *always relate, often relate, sometimes relate, rarely relate, don't relate*

Graduate coursework / Self-perceptions

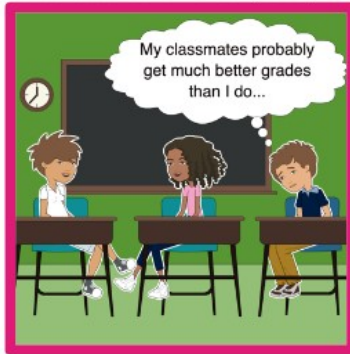

SoB 1

Graduate coursework / Self-perceptions

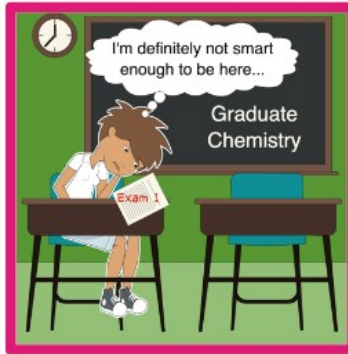

SoB 2

Interactions with faculty

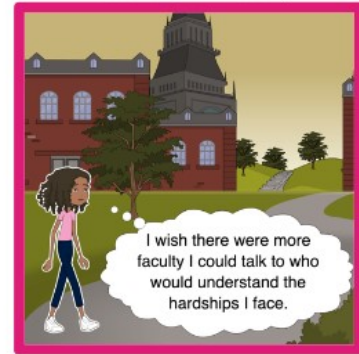

SoB 3

\*Social connectedness\*

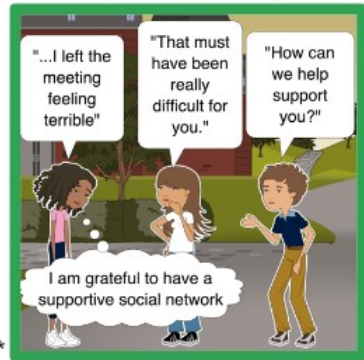

SoB 4

Social connectedness

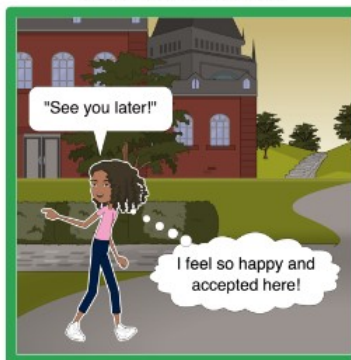

SoB 5

\*Teaching\*

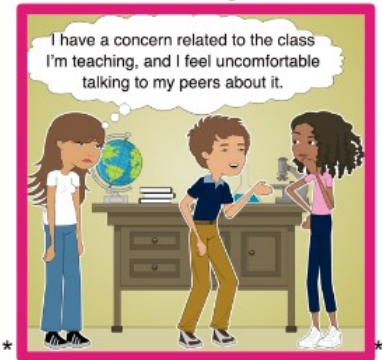

SoB 6

Self-perceptions (w.r.t. undefined measures of success)

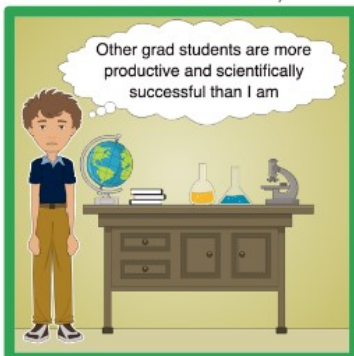

SoB 7

Self-perceptions (w.r.t. undefined measures of success)

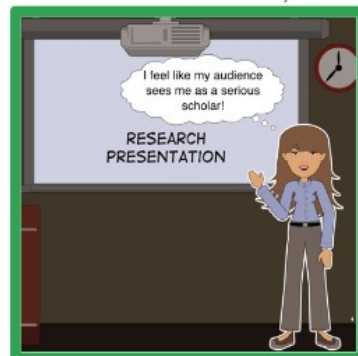

SoB 8

Academic support from peers & mentors

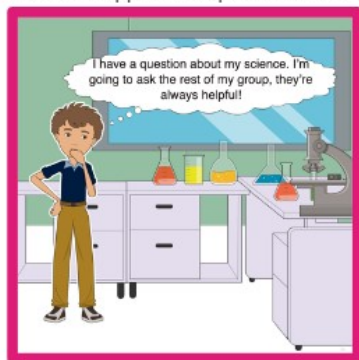

SoB 9

Academic support from peers & mentors

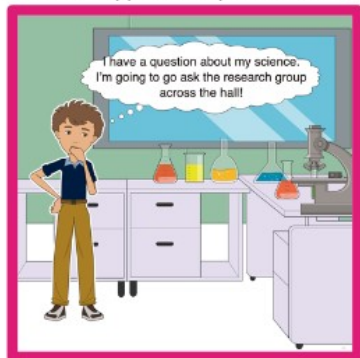

SoB 10

Social connectedness

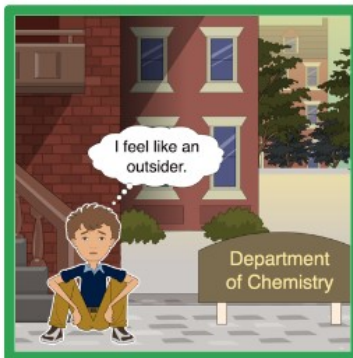

SoB 11

Interactions with faculty

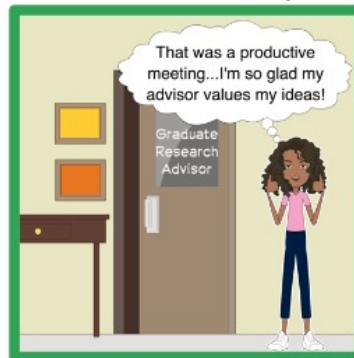

SoB 12

Self-perceptions (w.r.t. undefined measures of success)

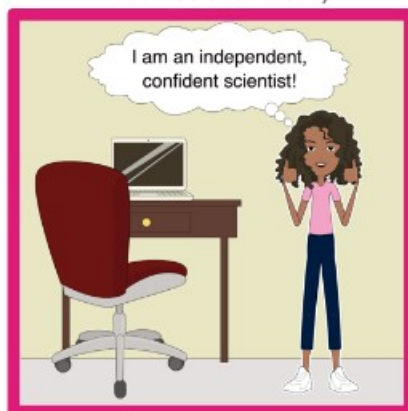

SoB 13

**SI 3. Positively worded narratives for each item:**

SoB1: My classmates probably do not get much better grades than I do.

SoB2: I am definitely smart enough to be here.

SoB3: I do not wish there were more faculty I could talk to who would understand the hardships I face.

SoB4: I am grateful to have a supportive social network.

SoB5: I feel so happy and accepted here.

SoB6: I am comfortable talking to my peers about a concern related to the class I'm teaching.

SoB7: Other [students/faculty] are not more productive and scientifically successful than I am.

SoB8: I feel like my [audience/peers] see[s] me as a serious scholar!

SoB9: I have a question about my science. I'm going to ask the rest of my group, they're always helpful!

SoB10: I have a question about my science. I'm going to ask the research group across the hall!

SoB11: I do not feel like an outsider.

SoB12: That was a productive meeting...I'm so glad my advisor values my ideas!

SoB13: I am an independent, confident scientist!

SI 4: Scree plot and Parallel analysis for Exploratory Factor Analysis (EFA) analysis

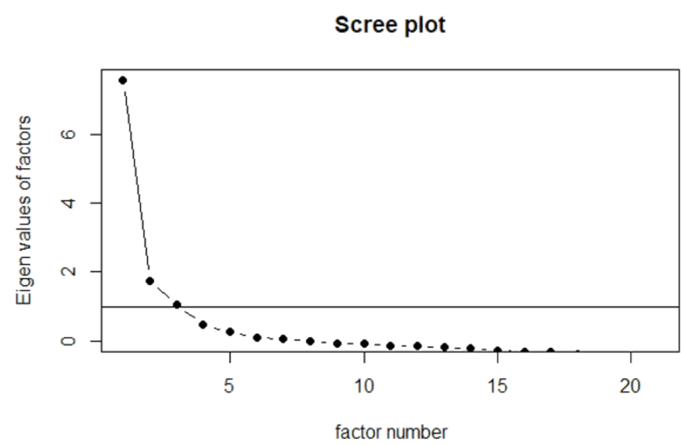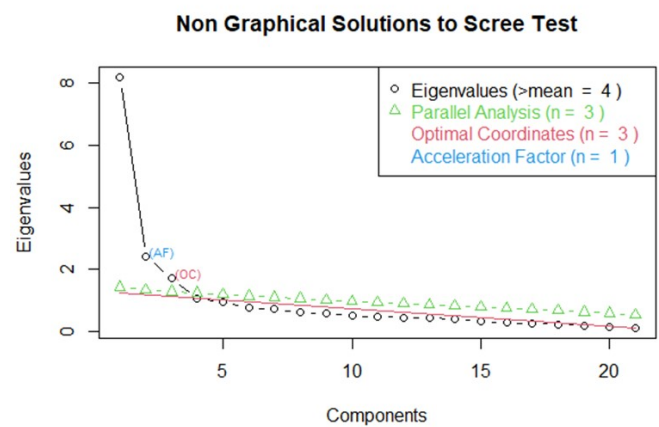

**SI 5. Model fit indexes for each Confirmatory Factor Analysis (CFA) model**

| <b>Model</b> | <b>CFI</b> | <b>TLI</b> | <b>WRMR</b> | <b>RMSEA</b> |
|--------------|------------|------------|-------------|--------------|
| 1            | 0.809      | 0.799      | 2.667       | 0.153        |
| 2            | 0.727      | 0.713      | 3.160       | 0.182        |
| 3            | 0.918      | 0.914      | 1.772       | 0.100        |
| 4            | 0.910      | 0.906      | 1.855       | 0.105        |
| 5            | 0.645      | 0.627      | 3.712       | 0.208        |

[illegible]



**SI 7: Kruskal–Wallis  $H$  test results for the sense of belonging survey items for both 2019 and 2020 data**

| Year 2019        | SoB1  | SoB2   | SoB3   | SoB4  | SoB5   | SoB6  | SoB7   | SoB8  | SoB9   | SoB10 | SoB11  | SoB12  | SoB13  |
|------------------|-------|--------|--------|-------|--------|-------|--------|-------|--------|-------|--------|--------|--------|
| Kruskal-Wallis H | 2.018 | 19.046 | 49.651 | 0.097 | 32.402 | 4.624 | 7.525  | 0.698 | 5.017  | 2.700 | 27.405 | 27.702 | 13.602 |
| df               | 2     | 2      | 2      | 2     | 2      | 2     | 2      | 2     | 2      | 2     | 2      | 2      | 2      |
| Asymp. Sig.      | 0.365 | 0.000* | 0.000* | 0.952 | 0.000* | 0.099 | 0.023* | 0.705 | 0.008* | 0.259 | 0.000* | 0.000* | 0.001* |
| Year 2020        | SoB1  | SoB2   | SoB3   | SoB4  | SoB5   | SoB6  | SoB7   | SoB8  | SoB9   | SoB10 | SoB11  | SoB12  | SoB13  |
| Kruskal-Wallis H | 0.914 | 6.011  | 9.506  | 2.487 | 23.084 | 4.083 | 22.886 | 5.656 | 10.135 | 4.148 | 12.326 | 35.445 | 5.154  |
| df               | 2     | 2      | 2      | 2     | 2      | 2     | 2      | 2     | 2      | 2     | 2      | 2      | 2      |
| Asymp. Sig.      | 0.633 | 0.050* | 0.009* | 0.288 | 0.000* | 0.130 | 0.000* | 0.059 | 0.006* | 0.126 | 0.002* | 0.000* | 0.008* |

\* $p < 0.05$
